# Supplementary material for: User Perceptions of ROTEM-Guided Haemostatic Resuscitation: A Mixed Qualitative–Quantitative Study
Source: MDPI journal article supplement (doi:10.3390/bioengineering10030386), 2023-03-21
Supplement: s1 [file s1]

## **Translated online survey invitation**

Dear colleagues

In order to better understand and take into account your needs when working with rotational thromboelastometry (ROTEM), our research group has created a short survey that reflects your views on various aspects of using it.

Your opinion will help to develop a user-friendly and user-oriented working environment and contribute to further research on this and related topics.

Link to the survey (max. 2 minutes): -

Kind regards, and thank you for helping us make life-saving decisions!

Your research team
